# Supplementary material for: Overexpression of AtBBD1, Arabidopsis Bifunctional Nuclease, Confers Drought Tolerance by Enhancing the Expression of Regulatory Genes in ABA-Mediated Drought Stress Signaling
Source: PubMed Central journal article supplement (PMC8001636; doi:10.3390/ijms22062936), 2021-03-13
Supplement: ijms-22-02936-s001.pdf [file ijms-22-02936-s001.pdf]

# Overexpression of *AtBBD1*, Arabidopsis bifunctional nuclease, confers drought tolerance by enhancing the expression of regulatory genes in ABA-mediated drought stress signaling

A K M Mahmudul Huque <sup>1</sup>, Wonmi So <sup>1</sup>, Minsoo Noh <sup>1</sup>, Min Kyoung You <sup>2,\*</sup> and Jeong Sheop Shin <sup>1,\*</sup>

<sup>1</sup> Division of Life Sciences, Korea University, Seoul 02841, Korea; mahmudornob@korea.ac.kr (A.K.M.M.H.); thso1124@gmail.com (W.S.); redmoon89@korea.ac.kr (M.N.)

<sup>2</sup> Graduate School of Biotechnology, Kyung Hee University, Yongin 446-701, Korea

\* Correspondence: zinggy93@gmail.com (M.K.Y.); jsshin@korea.ac.kr (J.S.S)

**Table S1.** List of primers used in this study

| Experiments                         | Name                      | Sequence 5'→3'                                               |
|-------------------------------------|---------------------------|--------------------------------------------------------------|
| Cloning of overexpression construct | BBD1_OX                   | F: TGCT <u>TCTAGA</u> ATGAGGTCGCTTCAAGCACCG                  |
|                                     |                           | R: CGC <u>GGATCC</u> TCATGTGTATTTCTTAATTTGCGTTTTGCC          |
| Cloning of sGFP construct           | BBD1-sGFP                 | F: TGCT <u>TCTAGA</u> ATGAGATCGGTTCAAGCACCAAGTTG             |
|                                     |                           | R: CGC <u>GGATCC</u> TCATGTGTATTTCTCAAGTTACGTTTGGCC          |
|                                     | BBD2-sGFP                 | F: TGCT <u>TCTAGA</u> ATGAGGTCGCTTCAAGCACCG                  |
|                                     |                           | R: CGC <u>GGATCC</u> TCATGTGTATTTCTTAATTTGCGTTTTGCC          |
| Cloning of Promoter:GUS construct   | Pro <sup>BBD1</sup> :GUS  | F: CCC <u>AAGCTT</u> ACAAGTTCCAGACACGAGCACCG                 |
|                                     |                           | R: CGC <u>GGATCC</u> TTCTTCTTCAATCAAACAGAGTATTTTAGTGT        |
|                                     | Pro <sup>BBD2</sup> :GUS  | F: CCC <u>AAGCTT</u> CACATTTAAATAGCTATATAATTCTCTATATAATTCTTA |
|                                     |                           | R: CGC <u>GGATCC</u> TTCACTTTTTGATGCAGAACCCAGAAA             |
| RT-PCR and qRT-PCR                  | BBD1                      | F: AAGACCGACCAAATGGTCAGGC                                    |
|                                     |                           | R: CAAGTTACGTTTGGCCCGAAACTGAC                                |
|                                     | BBD2                      | F: GGTATGATGAAGCCGCTGAGTG                                    |
|                                     |                           | R: CTTCTGGCAAATGGCAATGGCTTC                                  |
|                                     | PP2AA3                    | F: CCAAACATCAAATTTAACGTGGCCAAAATG                            |
|                                     |                           | R: GTTCTCCACAACCGCTTGGT                                      |
|                                     | eIF4a1                    | F: GCTCTCCCGTGGTTTCAAGGACCAGATC                              |
|                                     |                           | R: GTCTGTGAGCCAATCAACCTTACGCCTG                              |
|                                     | P5CS1                     | F: AGAGTCAATGGTGGCTCGCTTAGT                                  |
|                                     |                           | R: ACACGGCCGATTGGATCTTCCATA                                  |
| PRODH                               | F: ATTTGGCAGTACAAAATGCT   |                                                              |
|                                     | R: AGGACAATGCATCTGACATA   |                                                              |
| ABA1                                | F: CGACGATTGTTGCGTTTTCCGG |                                                              |

|          |                              |
|----------|------------------------------|
|          | R: GCATGCATCTTCGAAACCTGAG    |
| NCED3    | F: ACATGGAAATCGGAGTTACAGATAG |
|          | R: AGAAACAACAAACAAGAAACAGAGC |
| RD29B    | F: TACCTTCCGACCAGATAGCGG     |
|          | R: CGAAAACCCCATAGTCCCAACG    |
| RAB18    | F: CCAGCTCTAGCTCGGAGGA       |
|          | R: GACTGATCATGATGACCTGGCAAC  |
| RD20     | F: TGGTTTCCTATCTAAAGAAGCTGTG |
|          | R: ATACAAATCCCCAAACTGAATAACA |
| RD22     | F: GCTGTTCCACTGAGGTGGC       |
|          | R: ATGAGTCTCCGGGAGGAAGTG     |
| MYB44    | F: AATGGGGAAGTCTTTTCCCGG     |
|          | R: CCGTTGCATCTCCGTCATGTAAC   |
| ERD10    | F: GCTCTTCTCCTCTTCGAGTGATG   |
|          | R: CCACTGTTTTCACATGATCTCCTTC |
| PP2CA    | F: GCGGCGTTGCTCTTAACAAAG     |
|          | R: GACGACGCTTGATTATTCCTCCTC  |
| CYP707A3 | F: CATGCCTTTTGGTAGTGGGA      |
|          | R: CGATTGACCATCTGTACTTAGTGG  |
| NAC019   | F: AACTGTGGCTACCTGAAGAC      |
|          | R: CCGAGTTATTAACCCGTGA       |
| ZAT10    | F: AGGCTCTTACATCACCAAGATTAG  |
|          | R: TACAATTGTAGCTCAACTTCTCCA  |
| LEA4-5   | F: GTGACCGACCCGATTGGAAG      |
|          | R: CCCCGCCGGTTCCGTACCCG      |
| LTP3     | F: GTGGGTTGGTGCCACCTTCA      |
|          | R: TCACTTGATGTTGTTGCAGT      |
| MYC2     | F: ACCACGTCGAAGCAGAGACAAA    |
|          | R: TGTAAGCGATTGCGTCACCGAGTA  |

\* The bold underlined letters indicate restriction enzyme recognition sites. F, forward primer; R, reverse primer

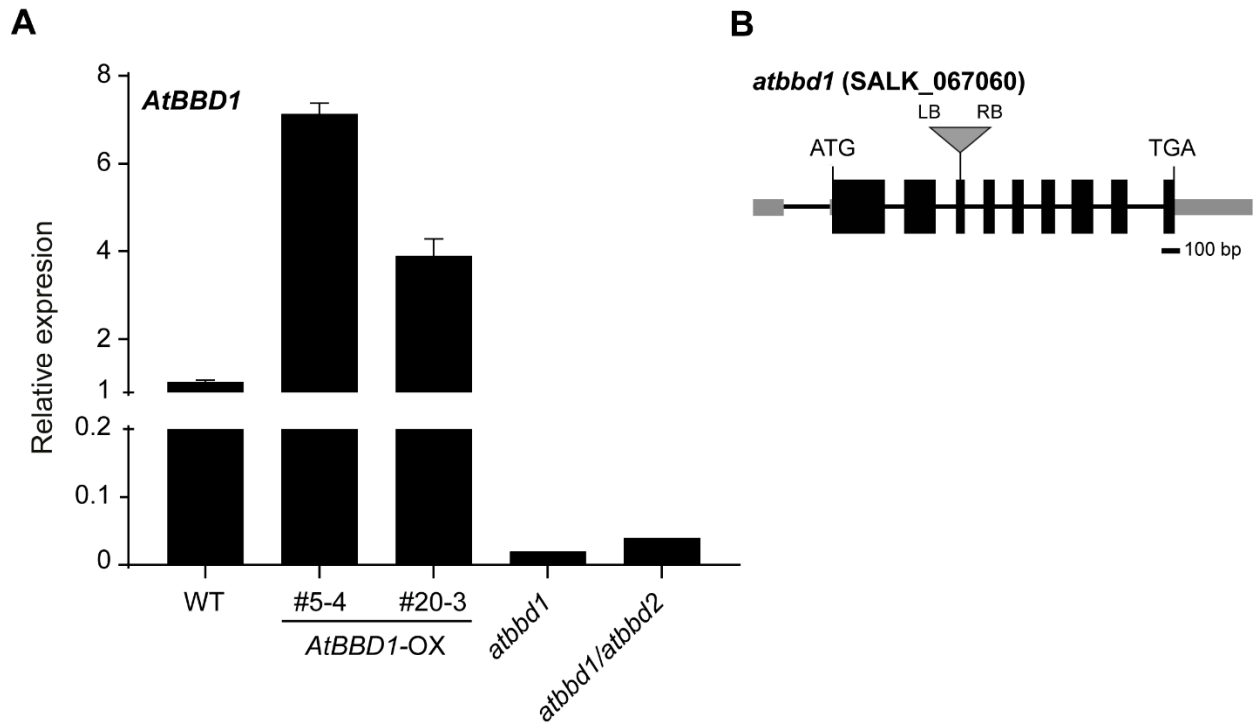

**Figure S1.** Characterization of *AtBBD1* overexpression (OX), *atbbd1* and *atbbd1/atbbd2* mutant lines. **(A)** qRT-PCR analysis of *AtBBD1* expression in the WT, two independent *AtBBD1*-OXs, *atbbd1*, and *atbbd1/atbbd2* plants. Two-week-old Arabidopsis (Col-0) plants grown on 1/2 MS agar media were used for qRT-PCR assay. The relative gene expression was calculated and normalized to the reference gene *eIF4a1*. The normalized mRNA levels in wild-type plants were set to 1. Data represent the mean  $\pm$  standard error values of three independent experiments. **(B)** T-DNA map of *atbbd1* (SALK\_067060).

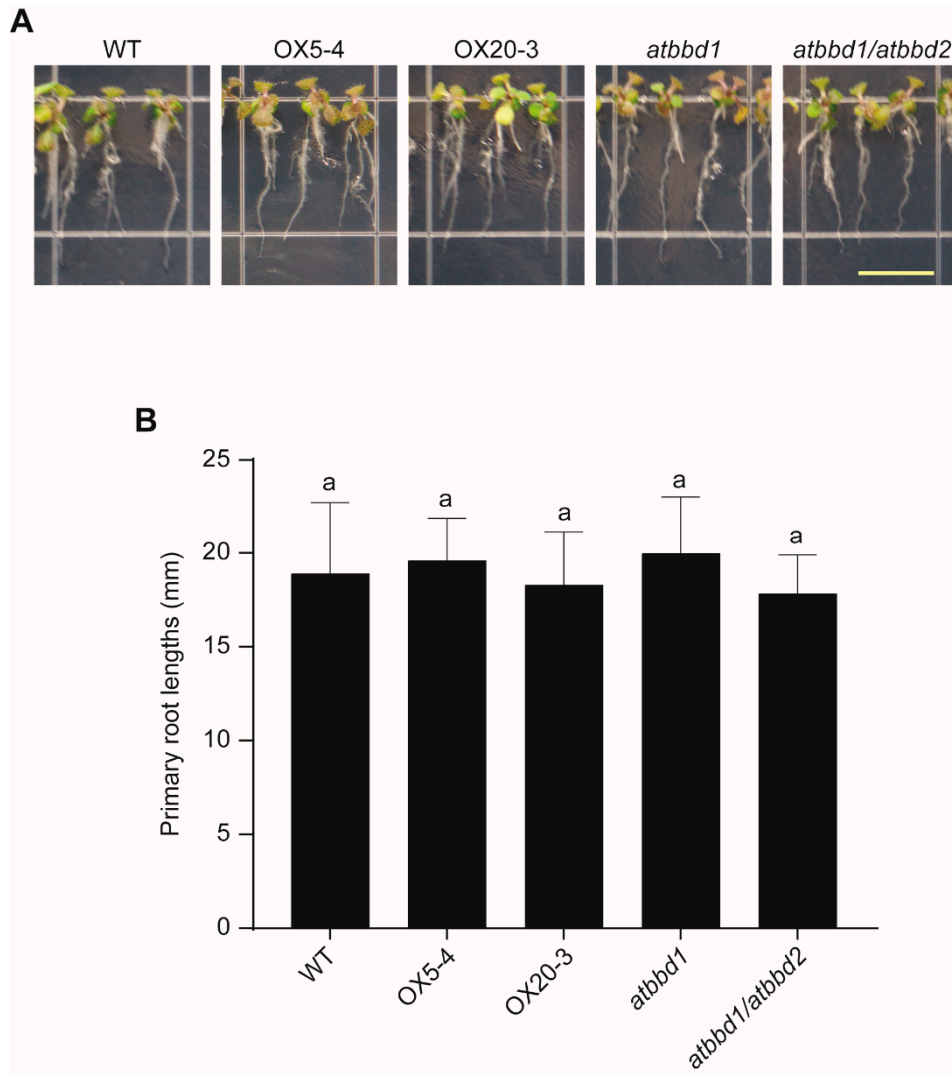

**Figure S2.** Root phenotype of the WT, OX5-4, OX20-3, *atbbd1* and *atbbd1/atbbd2* plants in response to MeJA. **(A)** Primary root growth of the WT, OX5-4, OX20-3, *atbbd1* and *atbbd1/atbbd2* plants on 1/2 MS agar plates containing 20  $\mu$ M MeJA. Representative photographs were taken 7 days after plating. Scale bar = 10 mm. **(B)** Measurement of primary root lengths of five lines in (A). Bars represent the mean  $\pm$  SD of 12 seedlings of each genotype. The same letter “a” indicates that root lengths of five lines are not significantly different (ANOVA;  $P < 0.05$ ).

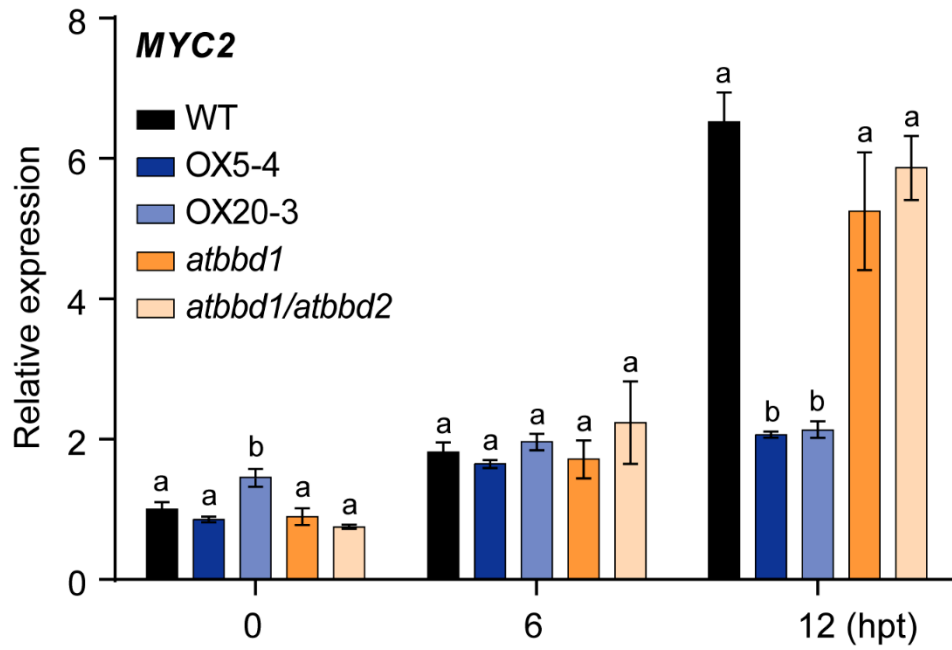

**Figure S3.** Expression pattern of *MYC2* in the WT, OX5-4, OX20-3, *atbbd1* and *atbbd1/atbbd2* lines under the drought stress conditions by qRT-PCR. Three-week-old soil-grown plants were watered with 20% PEG 6000 and qRT-PCR of *MYC2* expression was analyzed at designated time points. The relative gene expression was calculated and normalized to the reference gene *eIF4a1*. Data represent the mean  $\pm$  standard error of three independent experiments. One-way ANOVA with post-hoc Tukey test was used for the statistical comparison of all genotypes. Different letters indicate significant differences among genotypes at each time point ( $P < 0.05$ ).

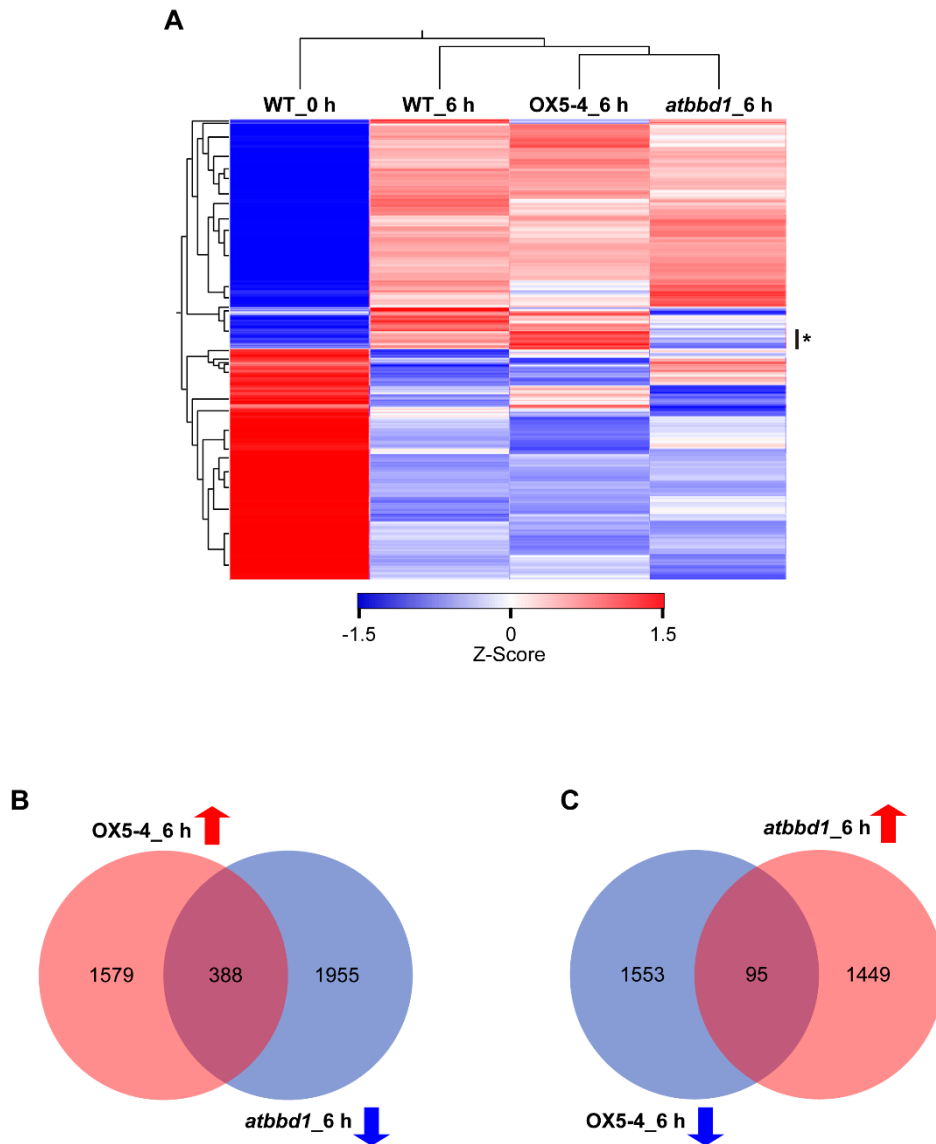

**Figure S4.** Transcriptome analysis of the WT, OX5-4, and *atbbd1* lines under the drought stress conditions. Three-week-old soil-grown plants were watered with 20% PEG 6000 and then RNA-seq was analyzed with samples collected after 6 h of treatment. **(A)** Heatmap of RNA-seq expression z-scores computed for all genes that were differentially expressed ( $\log_2(\text{foldchange}) > 1$ ) among all pairwise comparisons of the WT, OX5-4 and *atbbd1* plants under drought stress conditions with the WT grown under well-watered conditions. Each column in the heatmap is an individual sample. **(B)** Venn diagram of common and unique DEGs that were up-regulated in OX5-4 and down-regulated in *atbbd1* compared to the WT under the drought stress conditions. **(C)** Venn diagram of common and unique DEGs that were down-regulated in OX5-4 and up-regulated in *atbbd1* compared to the WT under the drought stress conditions.

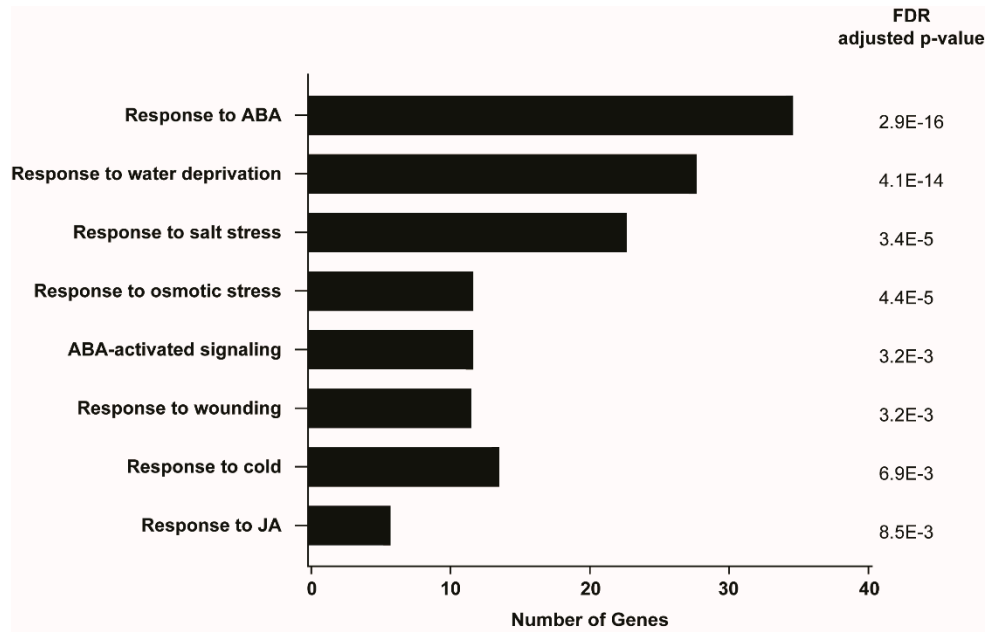

**Figure S5.** Gene ontology analysis of 388 differentially expressed genes that were up-regulated in OX5-4 and down-regulated in *atbdl* compared to the WT under the drought stress conditions. The biological processes showing the FDR (false discovery rate) adjusted p-value  $\geq 0.05$ , calculated by the Benjamini's method, were used in this analysis.

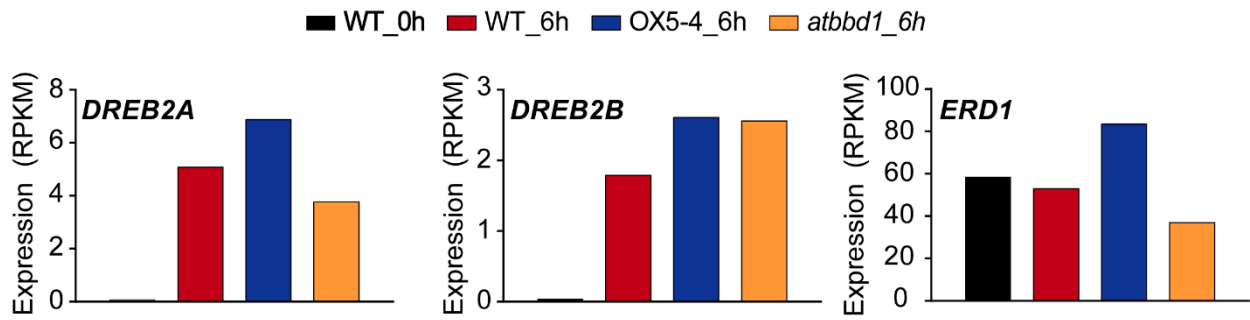

**Figure S6.** Expression of genes related to ABA-independent signaling in response to drought stress. RPKM levels of *DREB2A*, *DREB2B* and *ERD1* were determined by RNA-seq in the WT, OX5-4 and *atbbd1* plants under drought stress condition. Samples were collected from three-week-old soil-grown plants after 6 h of stress from watering with 20% PEG 6000.
